# Supplementary material for: Unveiling spatial heterogeneity of soil available phosphorus for site-specific fertilization in Andisols of Hokkaido, Japan
Source: Research Square preprint supplement (doi:10.21203/rs.3.rs-7984946/v1), 2025-11-13
Supplement: Supplementary file 1 [file 432ce2ffa13818ca65840e32.docx]

**Online Resource 1**. The historical data on produced crops and P2O5 fertilizer application in the East and West fields.

| Year | East field | | West field | |
| --- | --- | --- | --- | --- |
| Crops | kg-P2O5 ha-1 | Crops | kg-P2O5 ha-1 |
| 2012 | Corn | 144 | Pasture | 26.5 |
| 2013 | Corn | 0.00 | Pasture | 75.0 |
| 2014 | Corn | 102 | Pasture | 42.0 |
| 2015 | Corn | 102 | Pasture | 42.0 |
| 2016 | Corn | 102 | Pasture | 103 |
| 2017 | Corn | 119 | Pasture | 84.0 |
| 2018 | Corn | 119 | Pasture | 78.0 |
| 2019 | Corn | 119 | Pasture | 177 |
| 2020 | Corn | 119 | Corn | 345 |
| 2021 | Potato | n.d.* | Corn | 153 |
| Total |  | 926 |  | 1,125 |

*n.d., not defined.
